# Supplementary material for: Differing precipitation response between Solar Radiation Management and Carbon Dioxide Removal due to fast and slow components
Source: Copernicus journal article supplement (doi:10.5194/esd-2019-48), 2019-10-14
Supplement: Supplementary file 1 [file esd-2019-48-supplement.pdf]

Supplement of: “Differing precipitation response between Solar Radiation Management and Carbon Dioxide Removal due to fast and slow components”

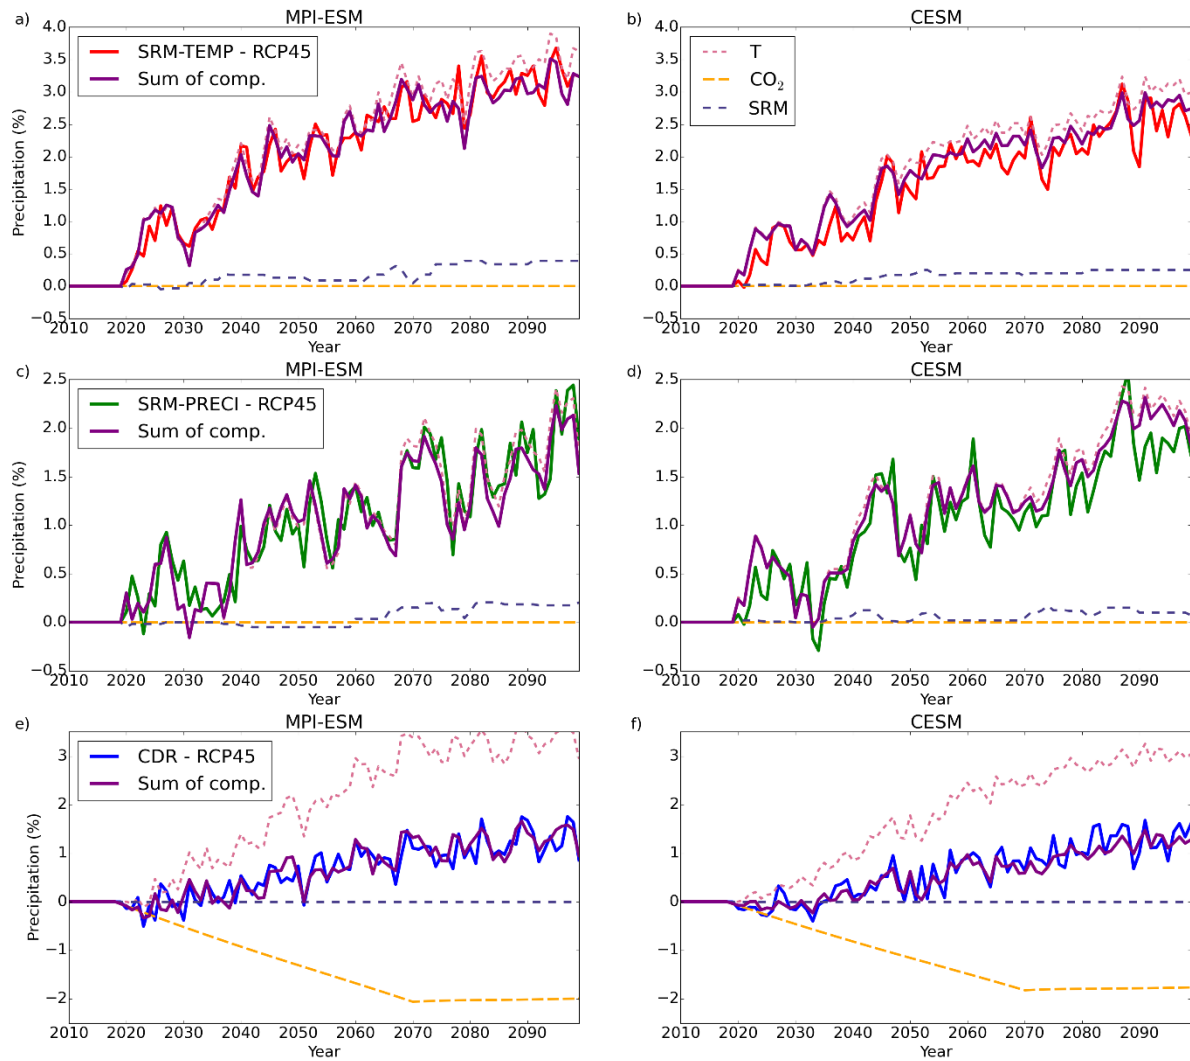

Figure S1. Precipitation and precipitation components for each geoengineering scenario compared to RCP45.

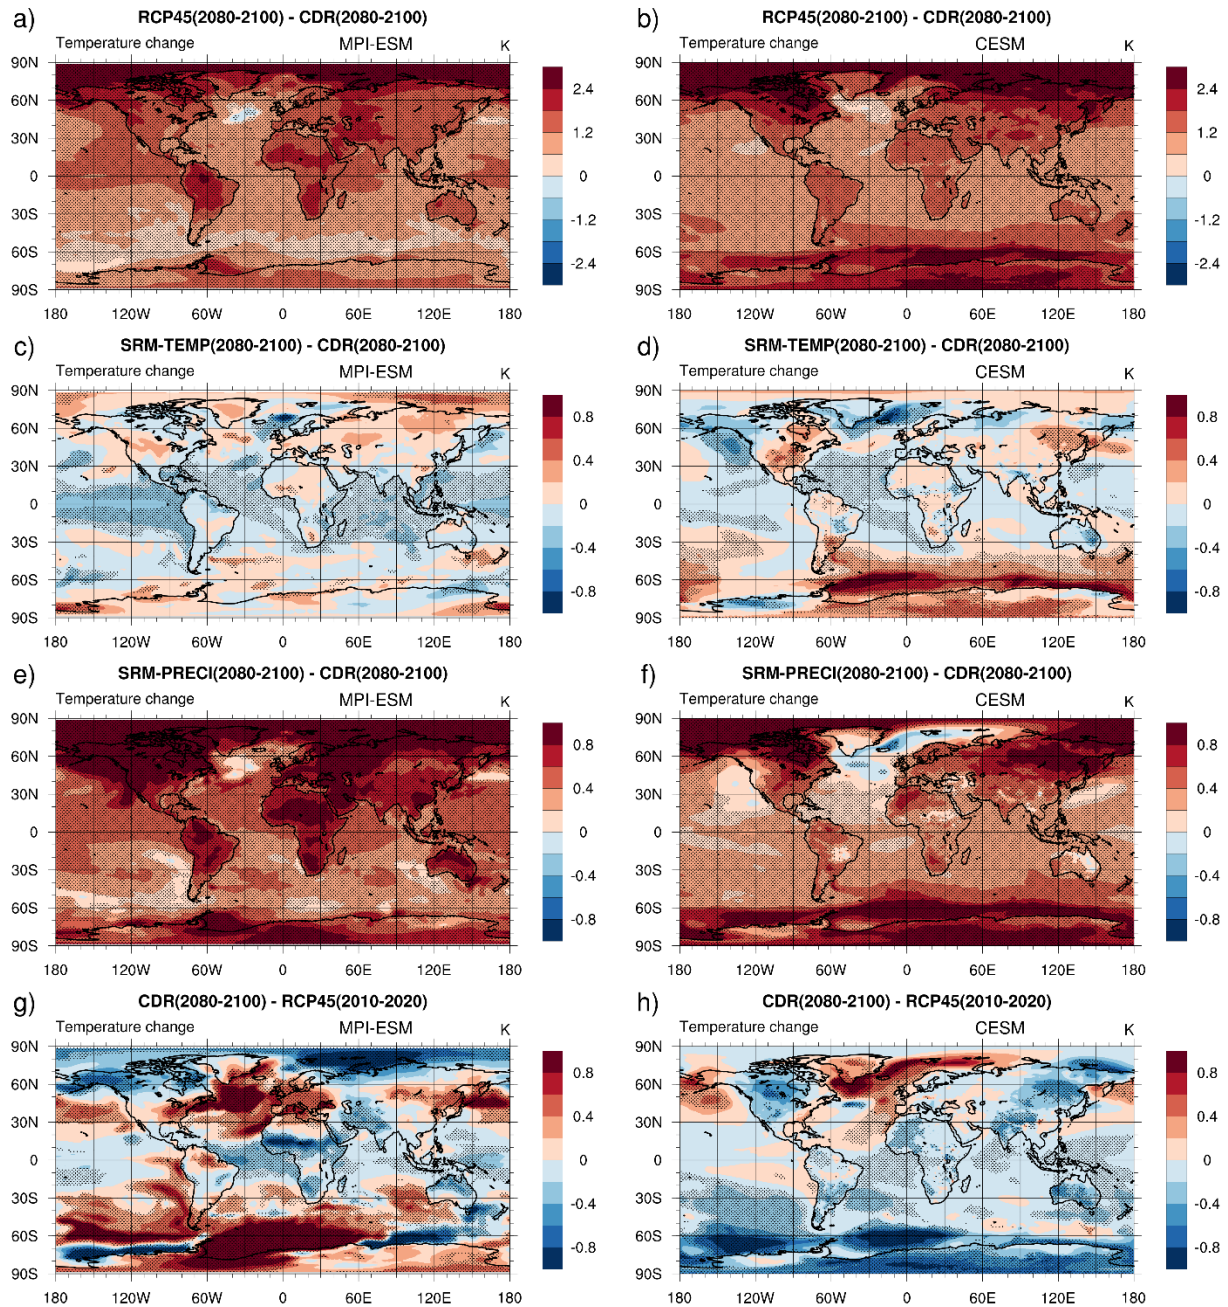

Figure S2. Regional temperature differences between a-b) RCP45 and CDR, c-d) SRM-TEMP and CDR, and e-f) SRM-PRECI and CDR for years 2080-2100. Also shown are the temperature differences between g-h) CDR in years 2080-2100 and RCP45 in years 2010-2020. The left and right columns show results for MPI-ESM and CESM, respectively. Stippling indicates regions where the temperature change is statistically significant at the 95% level, with significance levels estimated using a Student's paired  $t$ -test (sample of 20 yearly mean values for 3 ensemble members).

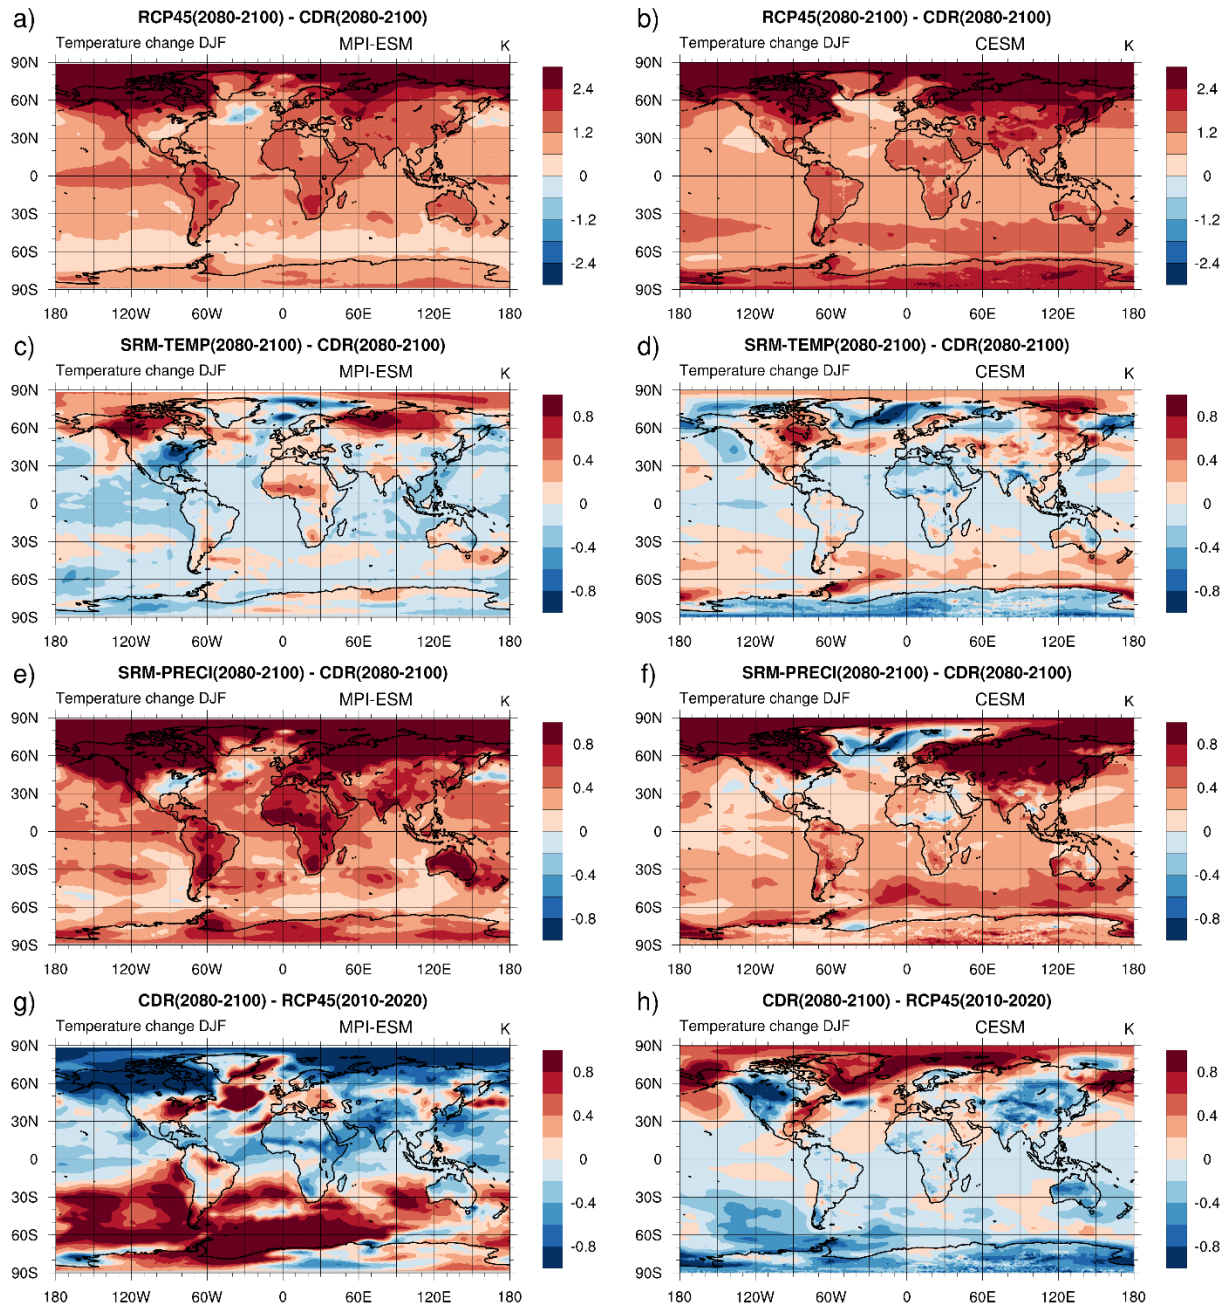

Figure S3. Regional temperature differences in December-January-February between a-b) RCP45 and CDR, c-d) SRM-TEMP and CDR, e-f) SRM-PRECI and CDR in years 2080-2100. Also shown are the temperature differences between g-h) CDR in years 2080-2100 and RCP45 in years 2010-2020. The left and right columns show results for MPI-ESM and CESM, respectively.

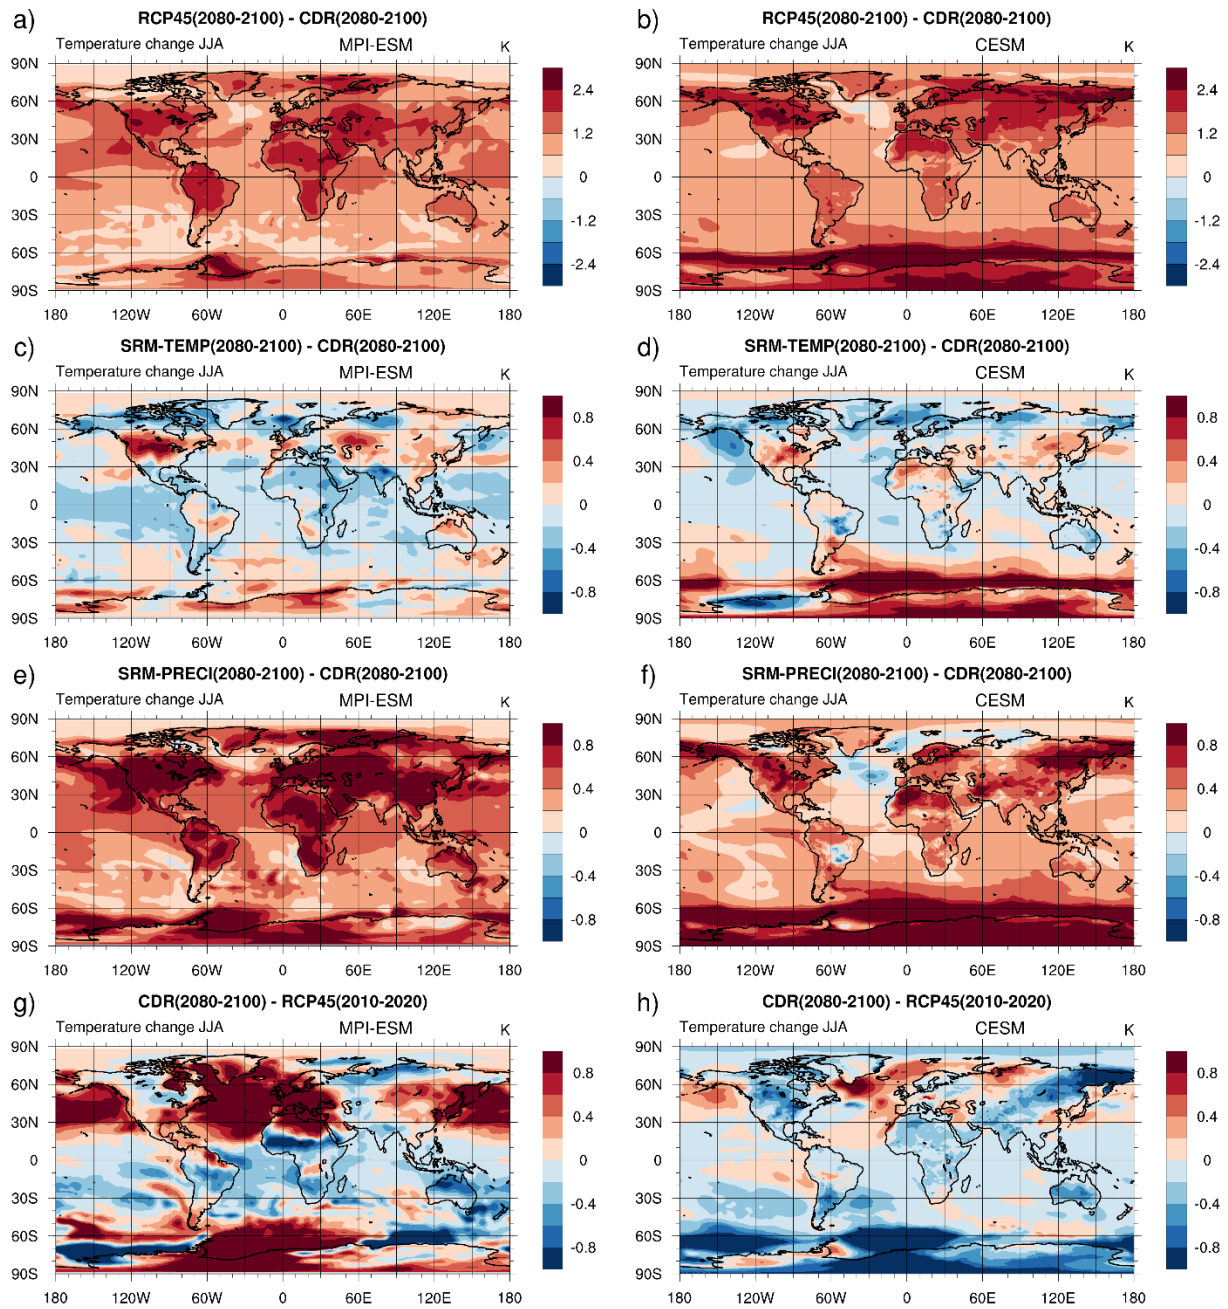

Figure S4. Regional temperature differences in June-July-August between a-b) RCP45 and CDR, c-d) SRM-TEMP and CDR, e-f) SRM-PRECI and CDR in years 2080-2100. Also shown are the temperature differences between g-h) CDR in years 2080-2100 and RCP45 in years 2010-2020. The left and right columns show results for MPI-ESM and CESM, respectively.

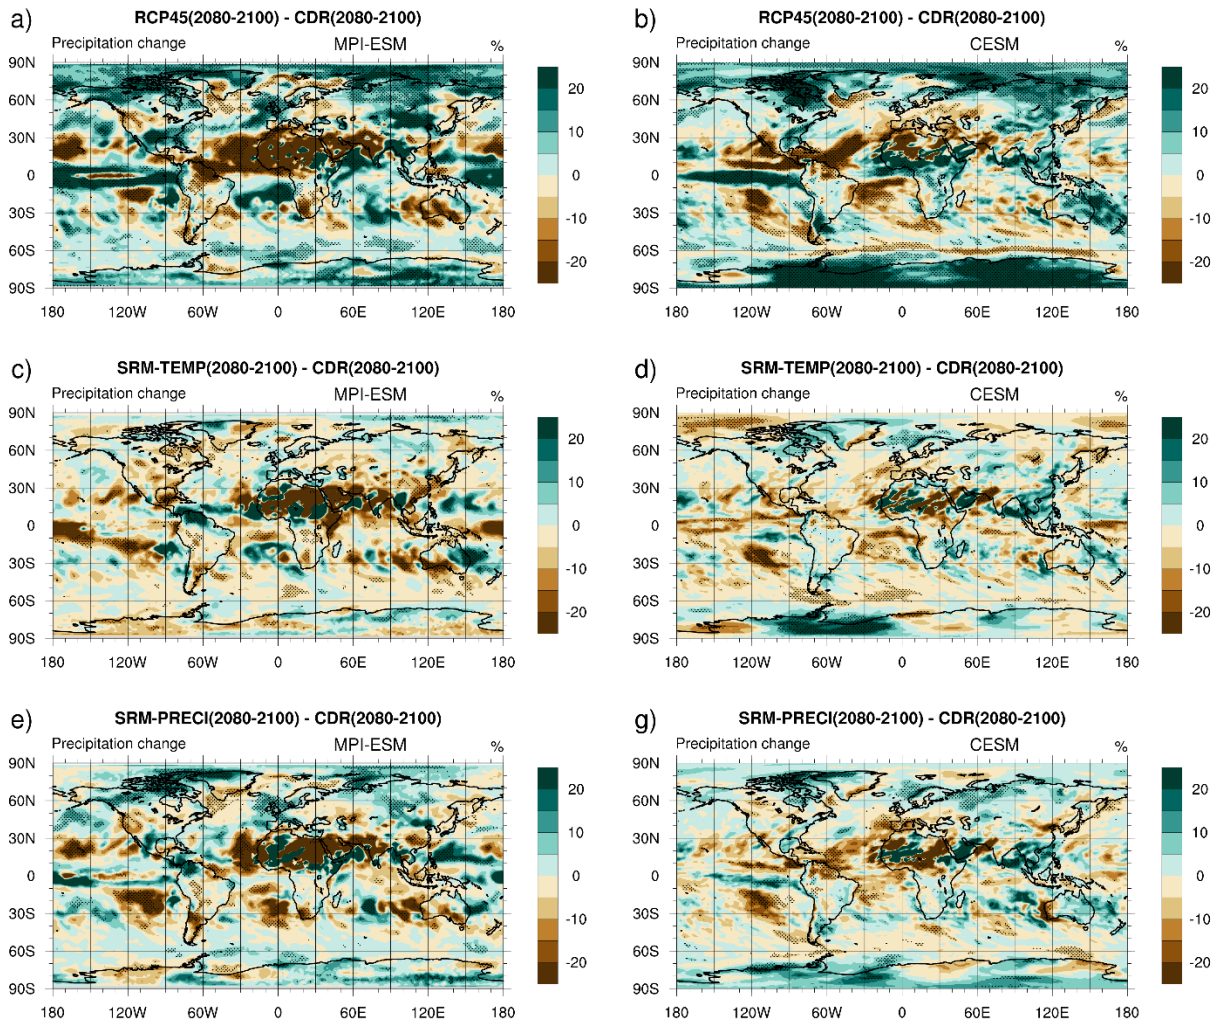

Figure S5. Regional precipitation differences in December-January-February between a-b) RCP45 and CDR, c-d) SRM-TEMP and CDR and e-f) SRM-PRECI and CDR in years 2080-2100. Stippling indicates regions where the temperature change is statistically significant at the 95% level, with significance levels estimated using a Student's paired  $t$ -test (sample of 20 yearly mean values for 3 ensemble members).

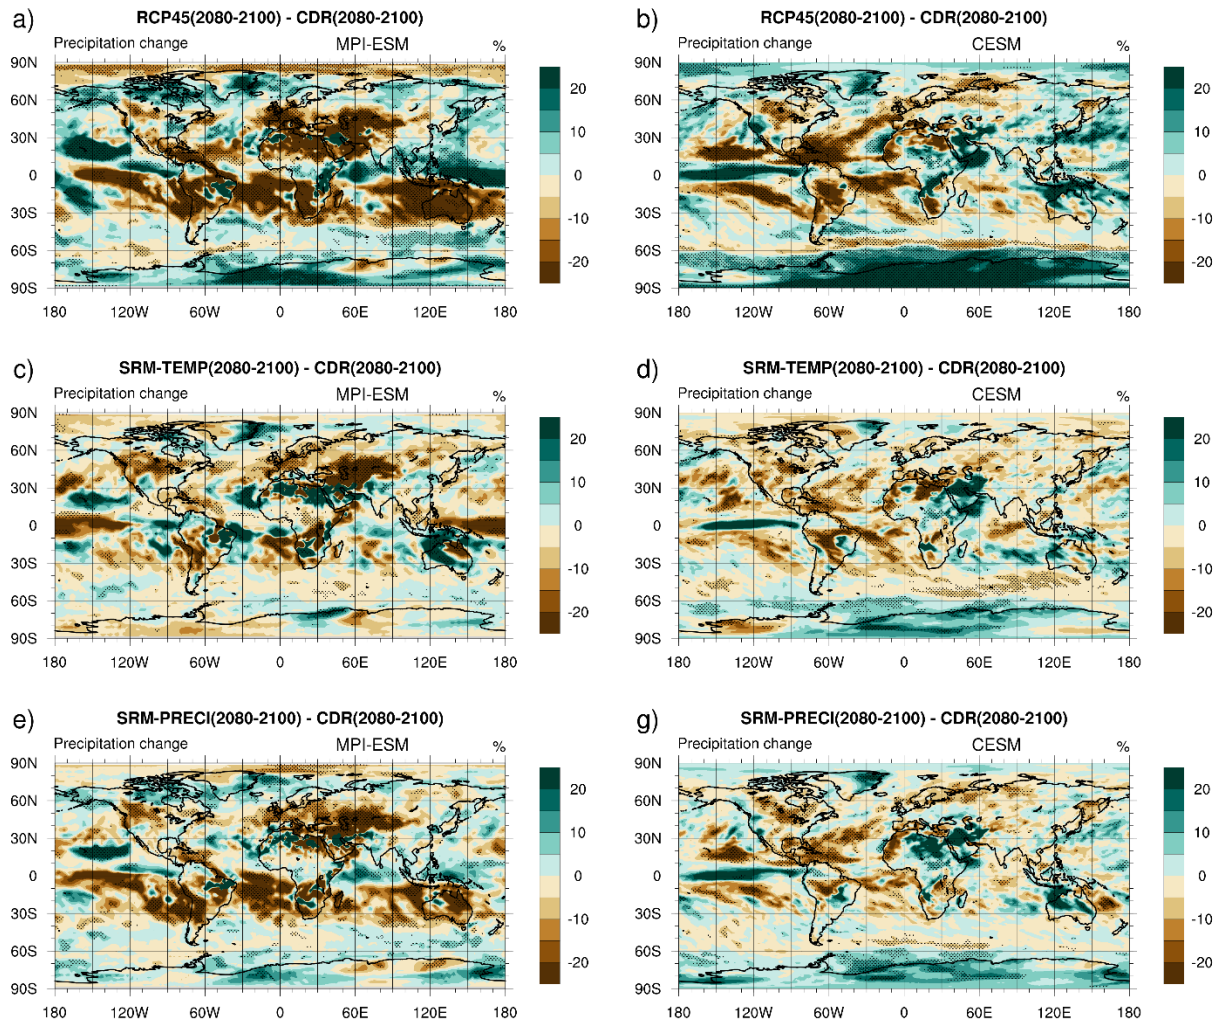

Figure S6. Regional precipitation differences in June-July-August between a-b) RCP45 and CDR, c-d) SRM-TEMP and CDR and e-f) SRM-PRECI and CDR in years 2080-2100. Stippling indicates regions where the temperature change is statistically significant at the 95% level, with significance levels estimated using a Student's paired  $t$ -test (sample of 20 yearly mean values for 3 ensemble members).
